# Supplementary material for: Symbiotic Associations in Ascidians: Relevance for Functional Innovation and Bioactive Potential
Source: MDPI journal article supplement (doi:10.3390/md19070370), 2021-06-26
Supplement: s1 [file s1]

**Table S2** - Occurrence (in percentage) of each phylum in the overall analysis of microbiome studies as well as the number of different genera detected in each of those phyla.

| Phylum              | Hosts (%) | Number of Genera |
|---------------------|-----------|------------------|
| Proteobacteria      | 53        | 305              |
| Cyanobacteria       | 52        | 31               |
| Bacteroidetes       | 34        | 109              |
| Actinobacteria      | 33        | 95               |
| Planctomycetes      | 24        | 8                |
| Chloroflexi         | 20        | 5                |
| Thaumarchaeota      | 20        | 2                |
| Arthropoda          | 17        | 12               |
| Acidobacteria       | 17        | 6                |
| Firmicutes          | 14        | 120              |
| Nitrospirae         | 12        | 3                |
| Ascomycota          | 10        | 33               |
| Verrucomicrobia     | 10        | 22               |
| Spirochaetes        | 8         | 4                |
| Ochrophyta          | 7         | 10               |
| Fusobacteria        | 6         | 5                |
| Apicomplexa         | 6         | 3                |
| Tenericutes         | 5         | 8                |
| Euryarchaeota       | 5         | 12               |
| Rhodophyta          | 5         | 4                |
| Chlamydiae          | 5         | 5                |
| Chlorophyta         | 4         | 2                |
| Deinococcus-Thermus | 4         | 3                |
| Crenarchaeota       | 4         | 0                |
| Lentisphaerae       | 4         | 2                |
| Porifera            | 3         | 6                |
| Synergistetes       | 3         | 3                |
| Fibrobacteres       | 3         | 0                |
| Chlorobi            | 3         | 2                |

|                       |   |   |
|-----------------------|---|---|
| Deferribacteres       | 3 | 2 |
| Thermotogae           | 2 | 1 |
| Armatimonadetes       | 2 | 0 |
| Nematoda              | 2 | 1 |
| Gemmatimonadetes      | 2 | 0 |
| Elusimicrobia         | 2 | 0 |
| Calditrichaeota       | 2 | 1 |
| Annelida              | 1 | 2 |
| Thermodesulfobacteria | 1 | 1 |
| Platyhelminthes       | 1 | 1 |
| Nitrospinae           | 1 | 1 |
| Cnidaria              | 1 | 5 |
| Aquificae             | 1 | 0 |
| Zygomycota            | 1 | 3 |
| Tracheophyta          | 1 | 1 |
| Phixviricota          | 1 | 1 |
| Dictyoglomi           | 1 | 0 |
| Ciliophora            | 1 | 1 |
| Choanozoa             | 1 | 1 |
| Cercozoa              | 1 | 1 |
| Basidiomycota         | 1 | 2 |
